# Supplementary material
Source: Elsevier journal article supplement (https://www.sciencedirect.com/science/article/pii/S0001731016300679)
Supplement: mmc1 [file S0001731016300679:mmc1.docx]

**Incluir el anexo 1 justo antes de la Bibliografía**

Anexo. **Composición y filiación profesional de los miembros del Grupo Español de Investigación en Dermatitis de Contacto y Alergia Cutánea (GEIDAC)**

M Hervella-Garcés*.* Servicio de Dermatología. Complejo Hospitalario de Navarra. Pamplona

J García-Gavín*.* Clínica Pérez&Gavín Dermatólogos. Vigo

J C Armario-Hita. Servicio de Dermatología. Hospital Universitario de Puerto Real, Cádiz

Leopoldo Borrego-Hernando*.* Servicio de Dermatología. Complejo Hospitalario Universitario Insular Materno Infantil, Las Palmas de Gran Canaria

J M Carrascosa-Carrillo *.*Servicio de Dermatología. Hospital Universitari Germans Trias i Pujol, Badalona

S Córdoba-Guijarro. Servicio de Dermatología. Hospital Universitario de Fuenlabrada, Madrid

V Fernández-Redondo. Servicio de Dermatología. Complejo Hospitalario Universitario de Santiago de Compostela

B García-Bravo. Departamento de Dermatología. Hospital Virgen Macarena. Sevilla

M E Gatica-Ortega. Servicio de Dermatología. Hospital Virgen de la Salud. Toledo

A Giménez-Arnau. Servicio de Dermatología. Hospital del Mar-Parc de Salut Mar. Barcelona

E Giménez-Arnau. Dermatochemistry Laboratory, University of Strasbourg-CNRS. Estrasburgo (Francia)

E Gómez de la Fuente. Servicio de Dermatología. Hospital Universitario Fundación Alcorcón. Madrid

R González Pérez. Servicio de Dermatología, Hospital Universitario de Araba. Vitoria-Gasteiz

D Guimaraens-Juanena. Dermatóloga. Madrid

F Heras-Mendaza. Servicio Dermatología. Hospital Fundación Jiménez Díaz. Madrid

P Manrique-Martínez. Servicio de Dermatología. Hospital Galdakao. Bilbao

P Mercader-García. Servicio de Dermatología. Hospital General Universitario Morales Meseguer. Murcia

A Miranda-Romero. Servicio de Dermatología. Hospital Clínico Universitario de Valladolid

F J Ortiz de Frutos. Servicio de Dermatología. Hospital Universitario 12 de Octubre. Madrid

M A Pastor-Nieto. Servicio de Dermatología. Hospital Universitario de Guadalajara

M Rodríguez-Serna. Servicio de Dermatología. Hospital Universitario la Fe. Valencia

I Ruiz-González. Servicio de Dermatología. Complejo Asistencial Universitario de León

P Sánchez-Pedreño.Servicio de Dermatología. Hospital Clínico Universitario Virgen de la Arrixaca. Murcia

J Sánchez-Pérez. Servicio de Dermatología. Hospital Universitario de la Princesa. Madrid

T Sanz-Sánchez*.* Servicio de Dermatología. Hospital Universitario Infanta Sofía. San Sebastián de los Reyes, Madrid

E Serra-Baldrich. Servicio de Dermatología. Hospital de la Santa Creu i Sant Pau. Barcelona

J Vilaplana-Vilaplana. Dermatólogo. Tarragona

J F Silvestre-Salvador. Servicio de Dermatologia. Hospital General Universitario de Alicante.
